# Supplementary material for: A putative long noncoding RNA-encoded micropeptide maintains cellular homeostasis in pancreatic β cells
Source: PubMed Central journal article supplement — Mol Ther Nucleic Acids. 2021 Jul 16;26:307–20. doi: 10.1016/j.omtn.2021.06.027 (PMC8416971; doi:10.1016/j.omtn.2021.06.027), 2021-07-16
Supplement: mmc1.pdf [file mmc1.pdf]

OMTN, Volume 26

## Supplemental information

### **A putative long noncoding RNA-encoded micropeptide maintains cellular homeostasis in pancreatic $\beta$ cells**

**Mark Li, Fan Shao, Qingwen Qian, Wenjie Yu, Zeyuan Zhang, Biyi Chen, Dan Su, Yuwei Guo, An-Vi Phan, Long-sheng Song, Samuel B. Stephens, Julien Sebag, Yumi Imai, Ling Yang, and Huojun Cao**

Gene expression for *TUNAR* (ENSG00000250366.2)

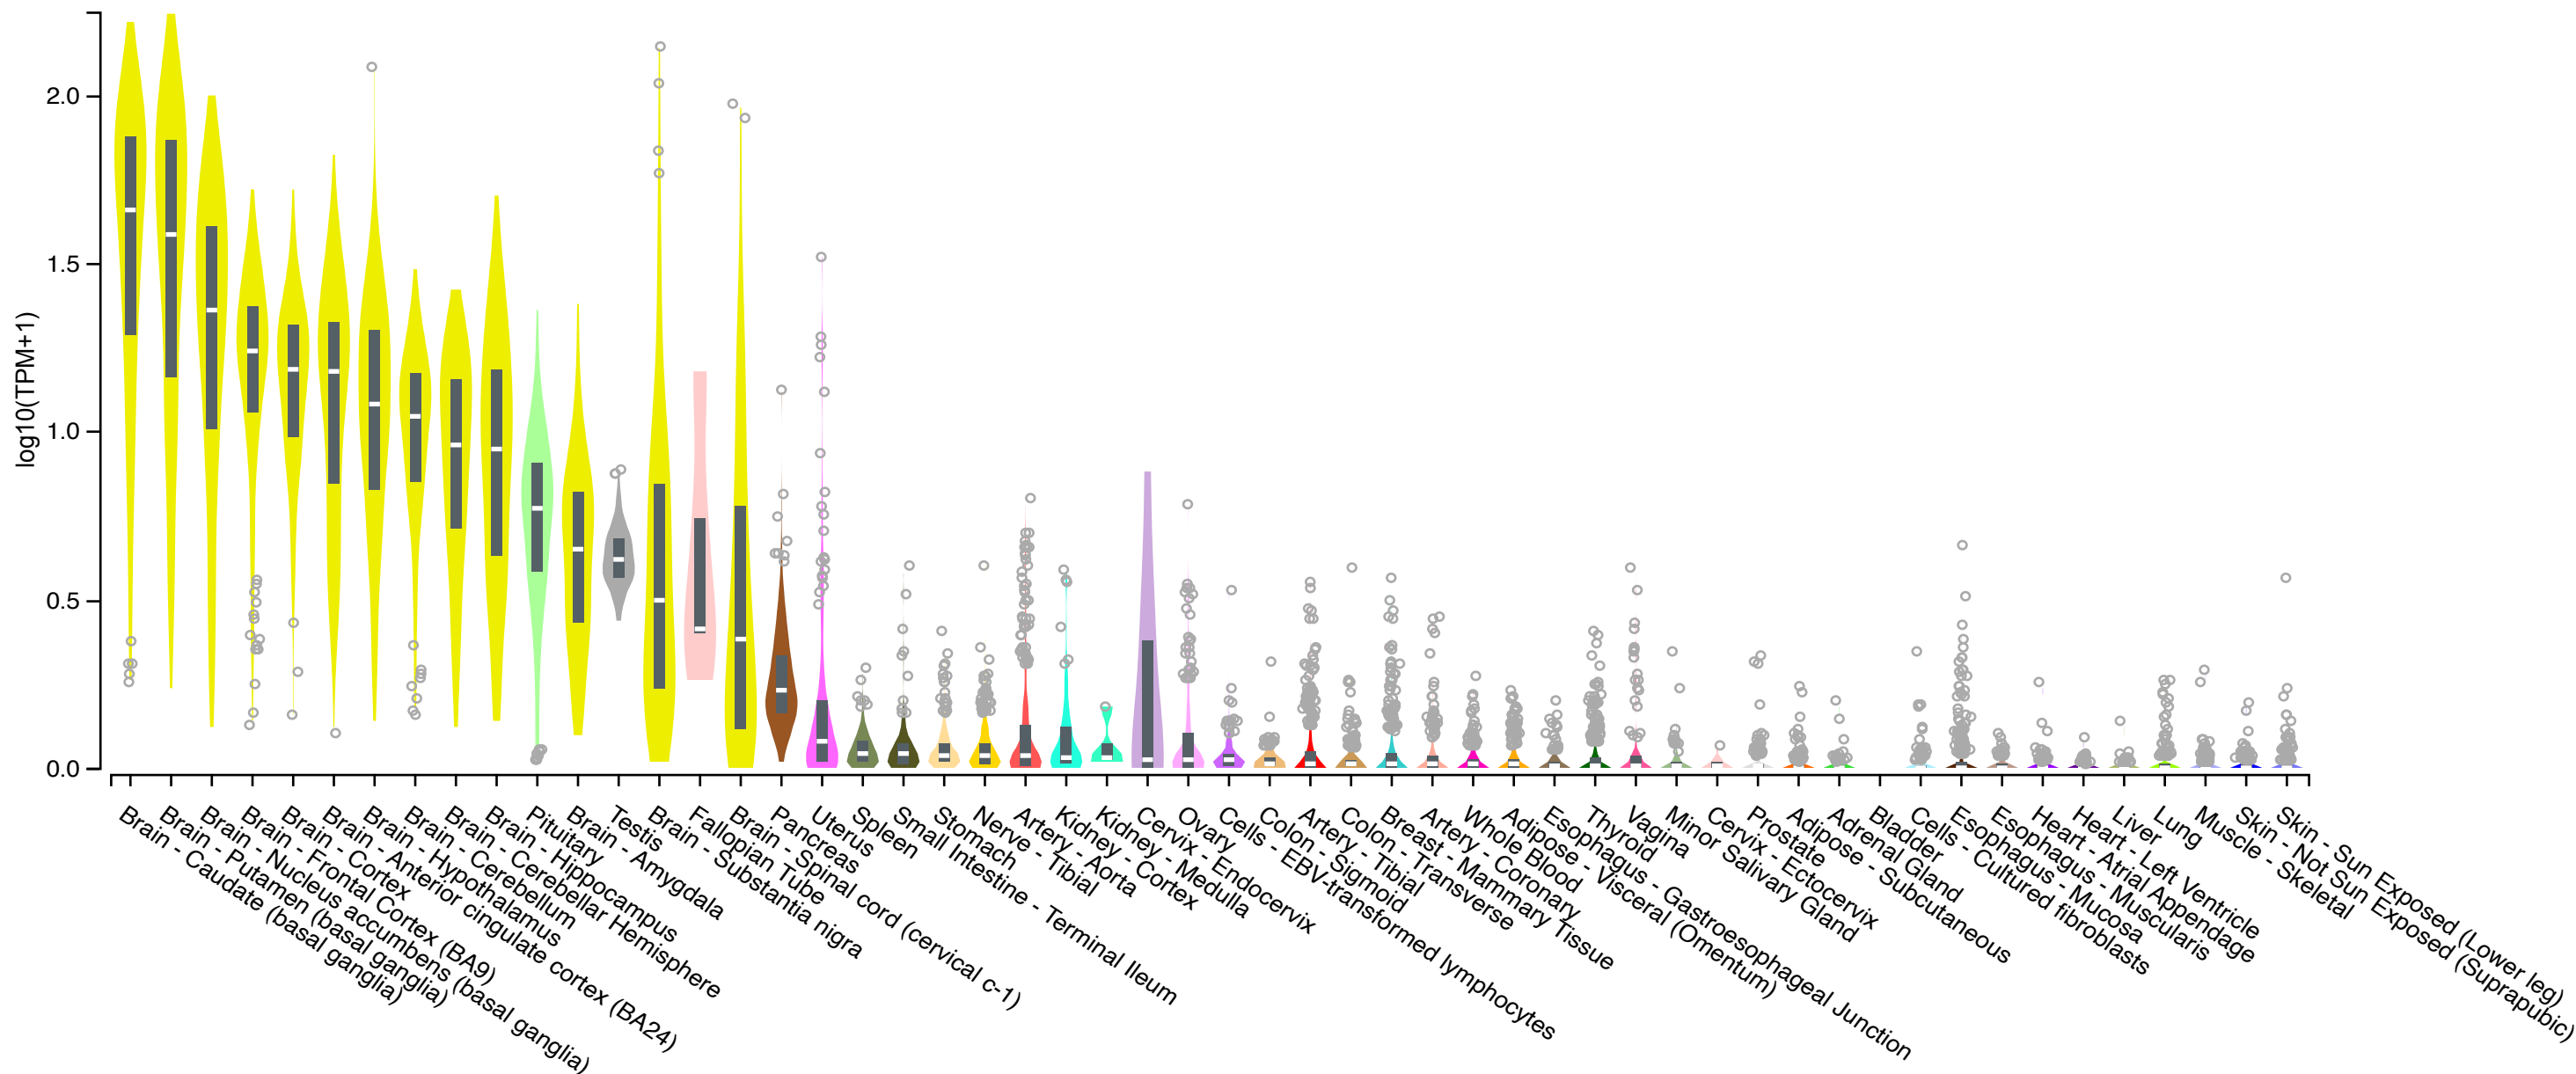

**Supplemental Figure 1.** Expression of *TUNAR* in various human tissues. Violin plot of *TUNAR* RNA expression across various human tissues. Expression values are measured by log10(TPM+1), data from GTEX database.

**A**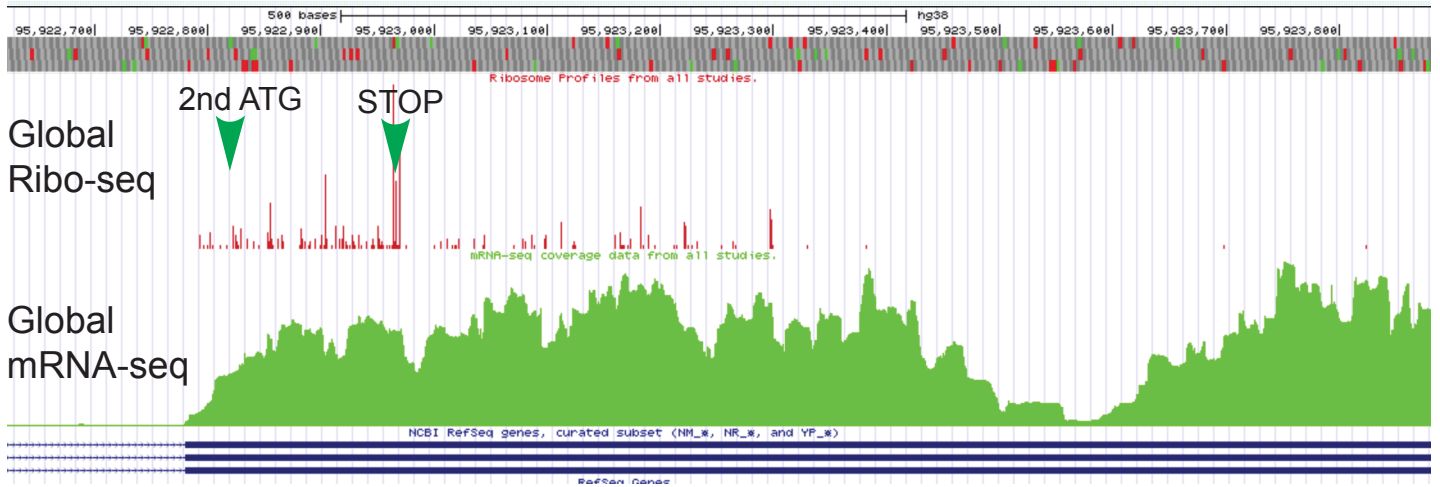**B**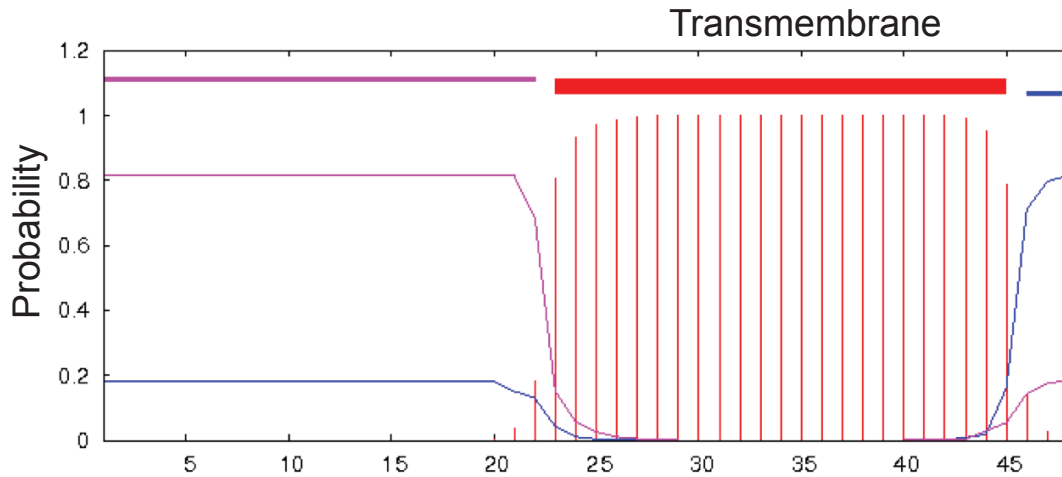**C**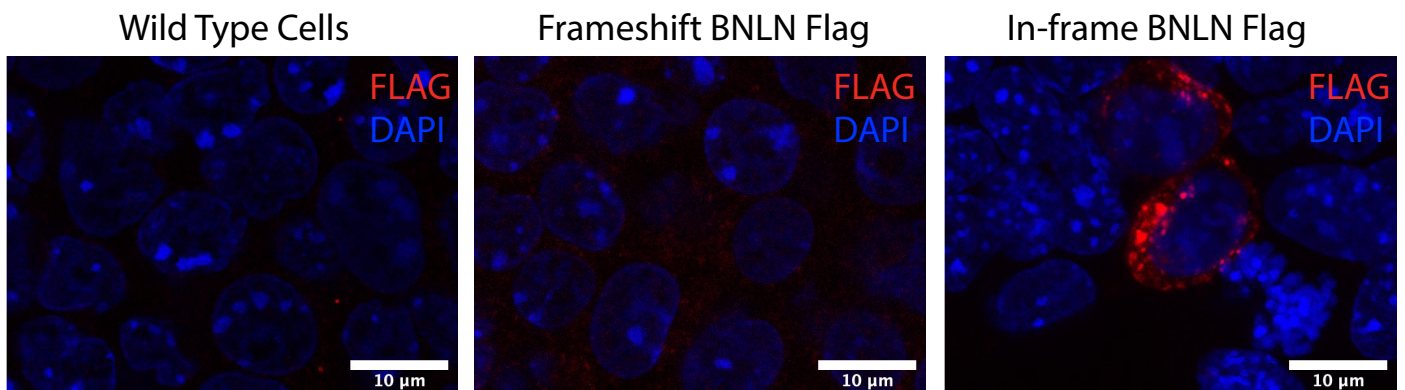

**Supplemental Figure 2.** Characterization of BNLN. **A.** Ribosomal (Ribo-seq) profiling track from GWIPS-viz genome browser indicating translation of sORF at the beginning of the last exon. **B.** TMHMM algorithms predict a transmembrane domain at the C-terminus of BNLN. **C.** Representative immunocytochemistry image of FLAG in CRISPR-edited mouse embryonic stem cells expressing FLAG fused to the endogenous BNLN allele in-frame or out-of-frame. The images were acquired with Zeiss 700 using a 63x lens with oil. The images were processed in FIJI.

|                             | cov    | pid    | 1 [                                            | ]                   | 65   |
|-----------------------------|--------|--------|------------------------------------------------|---------------------|------|
| 1 Human                     | 100.0% | 100.0% | RFSVSRKKTPTKAVITSENEDRGGQEKESKEESVLA           | LMLGIICTILNLVVIIFVY | YTTT |
| 2 Chimp                     | 100.0% | 96.9%  | RFSVSRKKTPTKAVITSENEDRGGQEKESKEESVLA           | LMLGIICTILNLVVIIFVY | YTTT |
| 3 Gorilla                   | 100.0% | 98.5%  | RFSVSRKKTPTKAVITSENEDRGGQEKESKEESVLA           | LMLGIICTILNLVVIIFVY | YTTT |
| 4 Orangutan                 | 100.0% | 98.5%  | RFSVSRKKTPTKAVITSENEDRGGQEKESKEESVLA           | LMLGIICTILNLVVIIFVY | YTTT |
| 5 Crab_eating_macaque       | 100.0% | 96.9%  | RFSVSRKKTPTKAVITSENEDRGGQEKESKEESVLA           | LMLGIICTILNLVVIIFVY | YTTT |
| 6 Baboon                    | 100.0% | 96.9%  | RFSVSRKKTPTKAVITSENEDRGGQEKESKEESVLA           | LMLGIICTILNLVVIIFVY | YTTT |
| 7 Green_monkey              | 100.0% | 96.9%  | RFSVSRKKTPTKAVITSENEDRGGQEKESKEESVLA           | LMLGIICTILNLVVIIFVY | YTTT |
| 8 Marmoset                  | 100.0% | 92.3%  | RFSVSRKKTPTKAVITSENEDRGGQEKESKEESVLA           | LMLGIICTILNLVVIIFVY | YTTT |
| 9 Squirrel_monkey           | 100.0% | 96.9%  | RFSVSRKKTPTKAVITSENEDRGGQEKESKEESVLA           | LMLGIICTILNLVVIIFVY | YTTT |
| 10 Bushbaby                 | 100.0% | 96.9%  | RFSVSRKKTPTKAVITSENEDRGGQEKESKEESVLA           | LMLGIICTILNLVVIIFVY | YTTT |
| 11 Lesser_Egyptian_jerboa   | 100.0% | 95.4%  | RFSVSRKKTPTKAVITSENEDRGGQEKESKEESVLA           | LMLGIICTILNLVVIIFVY | YTTT |
| 12 Prairie_vole             | 100.0% | 95.4%  | RFSVSRKKTPTKAVITSENEDRGGQEKESKEESVLA           | LMLGIICTILNLVVIIFVY | YTTT |
| 13 Golden_hamster           | 100.0% | 93.8%  | RFSVSRKKTPTKAVITSENEDRGGQEKESKEESVLA           | LMLGIICTILNLVVIIFVY | YTTT |
| 14 Mouse                    | 100.0% | 95.4%  | RFSVSRKKTPTKAVITSENEDRGGQEKESKEESVLA           | LMLGIICTILNLVVIIFVY | YTTT |
| 15 Rat                      | 100.0% | 92.3%  | RFSVSRKKTPTKAVITSENEDRGGQEKESKEESVLA           | LMLGIICTILNLVVIIFVY | YTTT |
| 16 Naked_mole_rat           | 100.0% | 93.8%  | RFSVSRKKTPTKAVITSENEDRGGQEKESKEESVLA           | LMLGIICTILNLVVIIFVY | YTTT |
| 17 Guinea_pig               | 100.0% | 95.4%  | RFSVSRKKTPTKAVITSENEDRGGQEKESKEESVLA           | LMLGIICTILNLVVIIFVY | YTTT |
| 18 Chinchilla               | 100.0% | 95.4%  | RFSVSRKKTPTKAVITSENEDRGGQEKESKEESVLA           | LMLGIICTILNLVVIIFVY | YTTT |
| 19 Brush_tailed_rat         | 100.0% | 93.8%  | RFSVSRKKTPTKAVITSENEDRGGQEKESKEESVLA           | LMLGIICTILNLVVIIFVY | YTTT |
| 20 Pika                     | 100.0% | 93.8%  | RFSVSRKKTPTKAVITSENEDRGGQEKESKEESVLA           | LMLGIICTILNLVVIIFVY | YTTT |
| 21 Pig                      | 100.0% | 95.4%  | RFSVSRKKTPTKAVITSENEDRGGQEKESKEESVLA           | LMLGIICTILNLVVIIFVY | YTTT |
| 22 Dolphin                  | 100.0% | 90.8%  | RFSVSRKKTPTKAVITSENEDRGGQEKESKEESVLA           | LMLGIICTILNLVVIIFVY | YTTT |
| 23 Killer_whale             | 100.0% | 92.3%  | RFSVSRKKTPTKAVITSENEDRGGQEKESKEESVLA           | LMLGIICTILNLVVIIFVY | YTTT |
| 24 Cow                      | 100.0% | 93.8%  | RFSVSRKKTPTKAVITSENEDRGGQEKESKEESVLA           | LMLGIICTILNLVVIIFVY | YTTT |
| 25 White_rhinoceros         | 100.0% | 95.4%  | RFSVSRKKTPTKAVITSENEDRGGQEKESKEESVLA           | LMLGIICTILNLVVIIFVY | YTTT |
| 26 Dog                      | 100.0% | 90.8%  | RFSVSRKKTPTKAVITSENEDRGGQEKESKEESVLA           | LMLGIICTILNLVVIIFVY | YTTT |
| 27 Ferret                   | 100.0% | 87.7%  | RFSVSRKKTPTKAVITSENEDRGGQEKESKEESVLA           | LMLGIICTILNLVVIIFVY | YTTT |
| 28 Pacific_walrus           | 100.0% | 90.8%  | RFSVSRKKTPTKAVITSENEDRGGQEKESKEESVLA           | LMLGIICTILNLVVIIFVY | YTTT |
| 29 Megabat                  | 100.0% | 93.8%  | RFSVSRKKTPTKAVITSENEDRGGQEKESKEESVLA           | LMLGIICTILNLVVIIFVY | YTTT |
| 30 Big_brown_bat            | 100.0% | 92.3%  | RFSVSRKKTPTKAVITSENEDRGGQEKESKEESVLA           | LMLGIICTILNLVVIIFVY | YTTT |
| 31 Shrew                    | 100.0% | 90.8%  | RFSVSRKKTPTKAVITSENEDRGGQEKESKEESVLA           | LMLGIICTILNLVVIIFVY | YTTT |
| 32 Star_nosed_mole          | 100.0% | 90.8%  | RFSVSRKKTPTKAVITSENEDRGGQEKESKEESVLA           | LMLGIICTILNLVVIIFVY | YTTT |
| 33 Elephant                 | 100.0% | 95.4%  | RFSVSRKKTPTKAVITSENEDRGGQEKESKEESVLA           | LMLGIICTILNLVVIIFVY | YTTT |
| 34 Cape_elephant_shrew      | 100.0% | 90.8%  | RFSVSRKKTPTKAVITSENEDRGGQEKESKEESVLA           | LMLGIICTILNLVVIIFVY | YTTT |
| 35 Manatee                  | 100.0% | 95.4%  | RFSVSRKKTPTKAVITSENEDRGGQEKESKEESVLA           | LMLGIICTILNLVVIIFVY | YTTT |
| 36 Cape_golden_mole         | 100.0% | 95.4%  | RFSVSRKKTPTKAVITSENEDRGGQEKESKEESVLA           | LMLGIICTILNLVVIIFVY | YTTT |
| 37 Tenrec                   | 100.0% | 89.2%  | RFSVSRKKTPTKAVITSENEDRGGQEKESKEESVLA           | LMLGIICTILNLVVIIFVY | YTTT |
| 38 Armadillo                | 100.0% | 90.8%  | RFSVSRKKTPTKAVITSENEDRGGQEKESKEESVLA           | LMLGIICTILNLVVIIFVY | YTTT |
| 39 Tasmanian_devil          | 100.0% | 78.5%  | RFSVSRKKTPTKAVITSENEDRGGQEKESKEESVLA           | LMLGIICTILNLVVIIFVY | YTTT |
| 40 Platypus                 | 100.0% | 83.1%  | RFSVSRKKTPTKAVITSENEDRGGQEKESKEESVLA           | LMLGIICTILNLVVIIFVY | YTTT |
| 41 Peregrine_falcon         | 100.0% | 75.4%  | RFSVSRKKTPTKAVITSENEDRGGQEKESKEESVLA           | LMLGIICTILNLVVIIFVY | YTTT |
| 42 Scarlet_macaw            | 93.8%  | 82.0%  | RFSVSRKKTPTKAVITSENEDRGGQEKESKEESVLA           | LMLGIICTILNLVVIIFVY | YTTT |
| 43 Chinese_softshell_turtle | 100.0% | 75.4%  | RFSVSRKKTPTKAVITSENEDRGGQEKESKEESVLA           | LMLGIICTILNLVVIIFVY | YTTT |
| 44 Weddell_seal             | 100.0% | 89.2%  | RFSVSRKKTPTKAVITSENEDRGGQEKESKEESVLA           | LMLGIICTILNLVVIIFVY | YTTT |
| 45 Rabbit                   | 98.5%  | 89.2%  | RFSVSRKKTPTKAVITSENEDRGGQEKESKEESVLA           | LMLGIICTILNLVVIIFVY | YTTT |
| 46 Opossum                  | 100.0% | 83.1%  | RFSVSRKKTPTKAVITSENEDRGGQEKESKEESVLA           | LMLGIICTILNLVVIIFVY | YTTT |
| 47 Aardvark                 | 100.0% | 95.4%  | RFSVSRKKTPTKAVITSENEDRGGQEKESKEESVLA           | LMLGIICTILNLVVIIFVY | YTTT |
| 48 Gibbon                   | 100.0% | 96.9%  | RFSVSRKKTPTKAVITSENEDRGGQEKESKEESVLA           | LMLGIICTILNLVVIIFVY | YTTT |
| 49 Chinese_tree_shrew       | 100.0% | 96.9%  | RFSVSRKKTPTKAVITSENEDRGGQEKESKEESVLA           | LMLGIICTILNLVVIIFVY | YTTT |
| 50 Microbat                 | 100.0% | 90.8%  | RFSVSRKKTPTKAVITSENEDRGGQEKESKEESVLA           | LMLGIICTILNLVVIIFVY | YTTT |
| 51 Rhesus                   | 100.0% | 96.9%  | RFSVSRKKTPTKAVITSENEDRGGQEKESKEESVLA           | LMLGIICTILNLVVIIFVY | YTTT |
| 52 Panda                    | 100.0% | 90.8%  | RFSVSRKKTPTKAVITSENEDRGGQEKESKEESVLA           | LMLGIICTILNLVVIIFVY | YTTT |
| 53 Alpaca                   | 100.0% | 95.4%  | RFSVSRKKTPTKAVITSENEDRGGQEKESKEESVLA           | LMLGIICTILNLVVIIFVY | YTTT |
| 54 Chinese_hamster          | 100.0% | 92.3%  | RFSVSRKKTPTKAVITSENEDRGGQEKESKEESVLA           | LMLGIICTILNLVVIIFVY | YTTT |
| 55 Cat                      | 100.0% | 93.8%  | RFSVSRKKTPTKAVITSENEDRGGQEKESKEESVLA           | LMLGIICTILNLVVIIFVY | YTTT |
| 56 Tibetan_antelope         | 100.0% | 93.8%  | RFSVSRKKTPTKAVITSENEDRGGQEKESKEESVLA           | LMLGIICTILNLVVIIFVY | YTTT |
| 57 Black_flying_fox         | 100.0% | 93.8%  | RFSVSRKKTPTKAVITSENEDRGGQEKESKEESVLA           | LMLGIICTILNLVVIIFVY | YTTT |
| 58 Squirrel                 | 93.8%  | 95.1%  | RFSVSRKKTPTKAVITSENEDRGGQEKESKEESVLA           | LMLGIICTILNLVVIIFVY | YTTT |
| 59 Sheep                    | 93.8%  | 95.1%  | RFSVSRKKTPTKAVITSENEDRGGQEKESKEESVLA           | LMLGIICTILNLVVIIFVY | YTTT |
| 60 David's_myotis_bat       | 93.8%  | 91.8%  | RFSVSRKKTPTKAVITSENEDRGGQEKESKEESVLA           | LMLGIICTILNLVVIIFVY | YTTT |
| 61 Wallaby                  | 93.8%  | 85.2%  | RFSVSRKKTPTKAVITSENEDRGGQEKESKEESVLA           | LMLGIICTILNLVVIIFVY | YTTT |
| 62 Rock_pigeon              | 93.8%  | 80.3%  | RFSVSRKKTPTKAVITSENEDRGGQEKESKEESVLA           | LMLGIICTILNLVVIIFVY | YTTT |
| 63 Saker_falcon             | 93.8%  | 80.3%  | RFSVSRKKTPTKAVITSENEDRGGQEKESKEESVLA           | LMLGIICTILNLVVIIFVY | YTTT |
| 64 Collared_flycatcher      | 93.8%  | 80.3%  | RFSVSRKKTPTKAVITSENEDRGGQEKESKEESVLA           | LMLGIICTILNLVVIIFVY | YTTT |
| 65 White_throated_sparrow   | 93.8%  | 80.3%  | RFSVSRKKTPTKAVITSENEDRGGQEKESKEESVLA           | LMLGIICTILNLVVIIFVY | YTTT |
| 66 Medium_ground_finch      | 93.8%  | 80.3%  | RFSVSRKKTPTKAVITSENEDRGGQEKESKEESVLA           | LMLGIICTILNLVVIIFVY | YTTT |
| 67 Zebra_finch              | 93.8%  | 80.3%  | RFSVSRKKTPTKAVITSENEDRGGQEKESKEESVLA           | LMLGIICTILNLVVIIFVY | YTTT |
| 68 Budgerigar               | 93.8%  | 82.0%  | RFSVSRKKTPTKAVITSENEDRGGQEKESKEESVLA           | LMLGIICTILNLVVIIFVY | YTTT |
| 69 Parrot                   | 93.8%  | 80.3%  | RFSVSRKKTPTKAVITSENEDRGGQEKESKEESVLA           | LMLGIICTILNLVVIIFVY | YTTT |
| 70 Mallard_duck             | 93.8%  | 77.0%  | RFSVSRKKTPTKAVITSENEDRGGQEKESKEESVLA           | LMLGIICTILNLVVIIFVY | YTTT |
| 71 Chicken                  | 93.8%  | 78.7%  | RFSVSRKKTPTKAVITSENEDRGGQEKESKEESVLA           | LMLGIICTILNLVVIIFVY | YTTT |
| 72 Turkey                   | 93.8%  | 78.7%  | RFSVSRKKTPTKAVITSENEDRGGQEKESKEESVLA           | LMLGIICTILNLVVIIFVY | YTTT |
| 73 Green_seaturtle          | 93.8%  | 82.0%  | RFSVSRKKTPTKAVITSENEDRGGQEKESKEESVLA           | LMLGIICTILNLVVIIFVY | YTTT |
| 74 Painted_turtle           | 93.8%  | 83.6%  | RFSVSRKKTPTKAVITSENEDRGGQEKESKEESVLA           | LMLGIICTILNLVVIIFVY | YTTT |
| 75 Spiny_softshell_turtle   | 93.8%  | 82.0%  | RFSVSRKKTPTKAVITSENEDRGGQEKESKEESVLA           | LMLGIICTILNLVVIIFVY | YTTT |
| 76 Lizard                   | 93.8%  | 80.3%  | RFSVSRKKTPTKAVITSENEDRGGQEKESKEESVLA           | LMLGIICTILNLVVIIFVY | YTTT |
| 77 X_tropicalis             | 93.8%  | 67.2%  | RFSVSRKKTPTKAVITSENEDRGGQEKESKEESVLA           | LMLGIICTILNLVVIIFVY | YTTT |
| 78 Tetraodon                | 93.8%  | 73.8%  | RFSVSRKKTPTKAVITSENEDRGGQEKESKEESVLA           | LMLGIICTILNLVVIIFVY | YTTT |
| 79 Fugu                     | 93.8%  | 72.1%  | RFSVSRKKTPTKAVITSENEDRGGQEKESKEESVLA           | LMLGIICTILNLVVIIFVY | YTTT |
| 80 Yellowbelly_pufferfish   | 93.8%  | 72.1%  | RFSVSRKKTPTKAVITSENEDRGGQEKESKEESVLA           | LMLGIICTILNLVVIIFVY | YTTT |
| 81 Nile_tilapia             | 93.8%  | 68.9%  | RFSVSRKKTPTKAVITSENEDRGGQEKESKEESVLA           | LMLGIICTILNLVVIIFVY | YTTT |
| 82 Burton_mouthbreeder      | 93.8%  | 68.9%  | RFSVSRKKTPTKAVITSENEDRGGQEKESKEESVLA           | LMLGIICTILNLVVIIFVY | YTTT |
| 83 Zebra_mbuna              | 93.8%  | 68.9%  | RFSVSRKKTPTKAVITSENEDRGGQEKESKEESVLA           | LMLGIICTILNLVVIIFVY | YTTT |
| 84 Pundamilia_nyererei      | 93.8%  | 68.9%  | RFSVSRKKTPTKAVITSENEDRGGQEKESKEESVLA           | LMLGIICTILNLVVIIFVY | YTTT |
| 85 Southern_platyfish       | 93.8%  | 70.5%  | RFSVSRKKTPTKAVITSENEDRGGQEKESKEESVLA           | LMLGIICTILNLVVIIFVY | YTTT |
| 86 Atlantic_cod             | 93.8%  | 62.3%  | RFSVSRKKTPTKAVITSENEDRGGQEKESKEESVLA           | LMLGIICTILNLVVIIFVY | YTTT |
| 87 Mexican_cavefish         | 93.8%  | 70.5%  | RFSVSRKKTPTKAVITSENEDRGGQEKESKEESVLA           | LMLGIICTILNLVVIIFVY | YTTT |
| 88 Spotted_gar              | 93.8%  | 75.4%  | RFSVSRKKTPTKAVITSENEDRGGQEKESKEESVLA           | LMLGIICTILNLVVIIFVY | YTTT |
| consensus/100%              |        |        | .....th.th...pw.h...-t-pt...+eskekeellamlgii   | ctilnlvviifvy       | tytt |
| consensus/90%               |        |        | ...h.ttt+pphssq...tsts-t+se...+eskekeellamlgii | ctilnlvviifvy       | tytt |
| consensus/80%               |        |        | ...lulr+phltt...vitsned+g...eskekeellamlgii    | ctilnlvviifvy       | tytt |
| consensus/70%               |        |        | ...s-rkkktptkavitsned+g...eskekeellamlgii      | ctilnlvviifvy       | tytt |

**Supplemental Figure 3.** Conservation of BNLN across vertebrate species. 88 species out of 100 vertebrate species (UCSC multiz100way) contain homologous sORFs. Multi-species alignment of in silico translated putative BNLN protein sequence.



Supplemental Table 1 BNLN\_aa\_sequences

| Specie                   | Predicted_ORF                                                      | Verified_BNLN                                   |
|--------------------------|--------------------------------------------------------------------|-------------------------------------------------|
| Human                    | MRFVSVLARKIKTATKMMVITSGNDEDRGGQEKESKEESVLAAMLGIIGTILNLVIVFYIYTTL   | MVITSGNDEDRGGQEKESKEESVLAAMLGIIGTILNLVIVFYIYTTL |
| Chimp                    | MRFVSVLARKIKTATKMMVITSGNDEDRGGQEKESKEESVLAAMLGIIGTILNLVIVFYIYTTL   | MVITSGNDEDRGGQEKESKEESVLAAMLGIIGTILNLVIVFYIYTTL |
| Gorilla                  | MRFVSVLARKIKTATKMMVITSGNDEDRGGQEKESKEESVLAAMLGIIGTILNLVIVFYIYTTL   | MVITSGNDEDRGGQEKESKEESVLAAMLGIIGTILNLVIVFYIYTTL |
| Orangutan                | MRFVSVLARKIKTATKMMVITSGNDEDRGGQEKESKEESVLAAMLGIIGTILNLVIVFYIYTTL   | MVITSGNDEDRGGQEKESKEESVLAAMLGIIGTILNLVIVFYIYTTL |
| Crab_eating_macaque      | MRFVSVLVRKIKTATKMMVITSGNDEDRGGQEKESKEESVLAAMLGIIGTILNLVIVFYIYTTL   | MVITSGNDEDRGGQEKESKEESVLAAMLGIIGTILNLVIVFYIYTTL |
| Baboon                   | MRFVSVLTRKIKTATKMMVITSGNDEDRGGQEKESKEESVLAAMLGIIGTILNLVIVFYIYTTL   | MVITSGNDEDRGGQEKESKEESVLAAMLGIIGTILNLVIVFYIYTTL |
| Green_monkey             | MRFVSVLARKIKTATKMMVITSGNDEDRGGQEKESKEESVLAAMLGIIGTILNLVIVFYIYTTL   | MVITSGNDEDRGGQEKESKEESVLAAMLGIIGTILNLVIVFYIYTTL |
| Marmoset                 | MRFVSVLARKIKTATKMMVITSGNDEDRGGQERESKEESVLAAMLGIIGTILNLVIVFYIYTTL   | MVITSGNDEDRGGQERESKEESVLAAMLGIIGTILNLVIVFYIYTTL |
| Squirrel_monkey          | MRFVSVLARKIKTATKMMVITSGNDEDRGGQEKESKEESVLAAMLGIIGTILNLVIVFYIYTTL   | MVITSGNDEDRGGQEKESKEESVLAAMLGIIGTILNLVIVFYIYTTL |
| Bushbaby                 | MRFVSVLARKIKTATKMMVITSGNDEDRGGQEKESKEESVLAAMLGIIGTILNLVIVFYIYTTL   | MVITSGNDEDRGGQEKESKEESVLAAMLGIIGTILNLVIVFYIYTTL |
| Lesser_Egyptian_jerboa   | MLFVSVLARKIKSFKATKMMVITSGNDEDRGGQEKESKEESVLAAMLGIIGTILNLVIVFYIYTTL | MVITSGNDEDRGGQEKESKEESVLAAMLGIIGTILNLVIVFYIYTTL |
| Prairie_vole             | MLFVSVLARKIKTATKMMVITSGNDEDRGGQEKESKEESVLAAMLGIIGTILNLVIVFYIYTTL   | MVITSGNDEDRGGQEKESKEESVLAAMLGIIGTILNLVIVFYIYTTL |
| Golden_hamster           | MLFVSVLSRKIKTATKMMVITSGNDEDRGGQEKENKEESVLAAMLGIIGTILNLVIVFYIYTTL   | MVITSGNDEDRGGQEKENKEESVLAAMLGIIGTILNLVIVFYIYTTL |
| Mouse                    | MLFVSVLERKIKTATKMMVITSGNDEDRGGQEKESKEESVLAAMLGIIGTILNLVIVFYIYTTL   | MVITSGNDEDRGGQEKESKEESVLAAMLGIIGTILNLVIVFYIYTTL |
| Rat                      | MLFVSDNLSRKIKTATKMMVITSGNDEDRGGQEKESKEESVLAAMLGIIGTILNLVIVFYIYTTL  | MVITSGNDEDRGGQEKESKEESVLAAMLGIIGTILNLVIVFYIYTTL |
| Naked_mole_rat           | MLFVSVLERKIKTATKMMVITSGNDEDRGGQEKESKEESVLAAMLGIIGTILNLVIVFYIYTTL   | MVITSGNDEDRGGQEKESKEESVLAAMLGIIGTILNLVIVFYIYTTL |
| Guinea_pig               | MLFVSVLVRKIKTATKMMVITSGNDEDRGGQEKESKEESVLAAMLGIIGTILNLVIVFYIYTTL   | MVITSGNDEDRGGQEKESKEESVLAAMLGIIGTILNLVIVFYIYTTL |
| Chinchilla               | MRFVSVLVRKIKTATKMMVITSGNDEDRGGQEKESKEESVLAAMLGIIGTILNLVIVFYIYTTL   | MVITSGNDEDRGGQEKESKEESVLAAMLGIIGTILNLVIVFYIYTTL |
| Brush_tailed_rat         | MLFVSVLVRKIKTATKMMVITSGNDEDRGGQEKESKEESVLAAMLGIIGTILNLVIVFYIYTTL   | MVITSGNDEDRGGQEKESKEESVLAAMLGIIGTILNLVIVFYIYTTL |
| Pika                     | MRFVSVSPVRKIKTATKMMVITSGNDEDRGGQEKESKEESVLAAMLGIIGTILNLVIVFYIYTTL  | MVITSGNDEDRGGQEKESKEESVLAAMLGIIGTILNLVIVFYIYTTL |
| Pig                      | MRCVSVLGRKIKTATKMMVITSGNDEDRGGQEKESKEESVLAAMLGIIGTILNLVIVFYIYTTL   | MVITSGNDEDRGGQEKESKEESVLAAMLGIIGTILNLVIVFYIYTTL |
| Dolphin                  | MRCVSVLGRKIKTATKMMVITSGNDEDRGGQEKESKEESVLAAMLGIIGTILNLVIVFYIYTTL   | MVITSGNDEDRGGQEKESKEESVLAAMLGIIGTILNLVIVFYIYTTL |
| Killer_whale             | MRCVSVLGRKIKTATKMMVITSGNDEDRGGQEKESKEESVLAAMLGIIGTILNLVIVFYIYTTL   | MVITSGNDEDRGGQEKESKEESVLAAMLGIIGTILNLVIVFYIYTTL |
| Cow                      | MRCVSVLVRKIKTATKMMVITSGNDEDRGGQERESKEESVLAAMLGIIGTILNLVIVFYIYTTL   | MVITSGNDEDRGGQERESKEESVLAAMLGIIGTILNLVIVFYIYTTL |
| White_rhinoceros         | MRCVSVLGRKIKTATKMMVITSGNDEDRGGQEKESKEESVLAAMLGIIGTILNLVIVFYIYTTL   | MVITSGNDEDRGGQEKESKEESVLAAMLGIIGTILNLVIVFYIYTTL |
| Dog                      | MRCVSVLGRKIKTATKMMVITSGNDEDRGGQEKESKEESVLAAMLGIIGTILNLVIVFYIYTTL   | MVITSGNDEDRGGQEKESKEESVLAAMLGIIGTILNLVIVFYIYTTL |
| Ferret                   | MRCVSVLGRKIKTATKMMVITSGNEEDREGQERENKEESVLAAMLGIIGTILNLVIVFYIYTTL   | MVITSGNEEDREGQERENKEESVLAAMLGIIGTILNLVIVFYIYTTL |
| Pacific_walrus           | MRCVSVLGRKIKTATKMMVITSGNEEDREGQERESKEESVLAAMLGIIGTILNLVIVFYIYTTL   | MVITSGNEEDREGQERESKEESVLAAMLGIIGTILNLVIVFYIYTTL |
| Megabat                  | MHCVSVLGRKIKTATKMMVITSGNDEDRGGQEKESKEESVLAAMLGIIGTILNLVIVFYIYTTL   | MVITSGNDEDRGGQEKESKEESVLAAMLGIIGTILNLVIVFYIYTTL |
| Big_brown_bat            | MRCVSVLGRKIKTATKMMVITSGNDEDRGGQEKESKEESVLAAMLGIIGTILNLVIVFYIYTTL   | MVITSGNDEDRGGQEKESKEESVLAAMLGIIGTILNLVIVFYIYTTL |
| Shrew                    | MRCVSVLGRKIKTATKMMVITSGNDEDRGGQEKESKEESVLAAMLGIIGTILNLVIVFYIYTTL   | MVITSGNDEDRGGQEKESKEESVLAAMLGIIGTILNLVIVFYIYTTL |
| Star_nosed_mole          | MRFVSVLGRKIKTATKMMVITSGNDEDRGGQEKESKEESVLAAMLGIIGTILNLVIVFYIYTTL   | MVITSGNDEDRGGQEKESKEESVLAAMLGIIGTILNLVIVFYIYTTL |
| Elephant                 | MRCVSVLGRKIKTATKMMVITSGNDEDRGGQEKESKEESVLAAMLGIIGTILNLVIVFYIYTTL   | MVITSGNDEDRGGQEKESKEESVLAAMLGIIGTILNLVIVFYIYTTL |
| Cape_elephant_shrew      | MRCVSVLGRKIKTATKMMVITSGNDEDRGGQEKESKEESVLAAMLGIIGTILNLVIVFYIYTTL   | MVITSGNDEDRGGQEKESKEESVLAAMLGIIGTILNLVIVFYIYTTL |
| Manatee                  | MRCVSVLGRKIKTATKMMVITSGNDEDRGGQEKESKEESVLAAMLGIIGTILNLVIVFYIYTTL   | MVITSGNDEDRGGQEKESKEESVLAAMLGIIGTILNLVIVFYIYTTL |
| Cape_golden_mole         | MRCVSVLGRKIKTATKMMVITSGNDEDRGGQEKESKEESVLAAMLGIIGTILNLVIVFYIYTTL   | MVITSGNDEDRGGQEKESKEESVLAAMLGIIGTILNLVIVFYIYTTL |
| Tenrec                   | MRCVSVLGRKIKSLGTMVITSGNDEDRGGQEKESKEESVLAAMLGIIGTILNLVIVFYIYTTL    | MVITSGNDEDRGGQEKESKEESVLAAMLGIIGTILNLVIVFYIYTTL |
| Armadillo                | MRYVSVLGRKIKTATKMMVITSGNDEDRGGQERESKEESVLAAMLGIIGTILNLVIVFYIYTTL   | MVITSGNDEDRGGQERESKEESVLAAMLGIIGTILNLVIVFYIYTTL |
| Tasmanian_devil          | MHCMLNLRRIKNTLTKMMVITSGNEEDREGQERENKEESVLAAMLGIIGTILNLVIVFYIYTTL   | MVITSGNEEDREGQERENKEESVLAAMLGIIGTILNLVIVFYIYTTL |
| Platypus                 | AHFVSVLRRRIKATKMMVITSGNEEEKGNHEKESKEETVLAAMLGIIGTILNLVIVFYIYTTL    | MVITSGNEEEKGNHEKESKEETVLAAMLGIIGTILNLVIVFYIYTTL |
| Peregrine_falcon         | EMSRVILKGRIKLATKMMVITSGNEEDKGSQEKESKEETILAMLGIIGTILNLVIVFYIYTTL    | MVITSGNEEDKGSQEKESKEETILAMLGIIGTILNLVIVFYIYTTL  |
| Scarlet_macaw            | VILKRRIKLATKMMVITSGNEEDKGSQEKESKEETILAMLGIIGTILNLVIVFYIYTTL        | MVITSGNEEDKGSQEKESKEETILAMLGIIGTILNLVIVFYIYTTL  |
| Chinese_softshell_turtle | ASSWISLRRRLKTLTKMMVITSGNEEDKGNQEKESKEETILAMLGIIGTILNLVIVFYIYTTL    | MVITSGNEEDKGNQEKESKEETILAMLGIIGTILNLVIVFYIYTTL  |
| Weddell_seal             | MRCVSVLGRKIKTATKMMVITSGNEEDREGQERESKEESVLAAMLGIIGTILNLVIVFYIYTTL   | MVITSGNEEDREGQERESKEESVLAAMLGIIGTILNLVIVFYIYTTL |
| Rabbit                   | MRFVSVLSRKIKTATKMMVITGGSDERGGQERESKEESVLAAMLGIIGTILNLVIVFYIYTTL    | MVITGGSDERGGQERESKEESVLAAMLGIIGTILNLVIVFYIYTTL  |
| Opossum                  | MHCVMLSRRRIKTLTKMMVITSGNEEDREGQERENKEESVLAAMLGIIGTILNLVIVFYIYTTL   | MVITSGNEEDREGQERENKEESVLAAMLGIIGTILNLVIVFYIYTTL |
| Aardvark                 | MRCVSVLGRKIKTATKMMVITSGNDEDRGGQEKESKEESVLAAMLGIIGTILNLVIVFYIYTTL   | MVITSGNDEDRGGQEKESKEESVLAAMLGIIGTILNLVIVFYIYTTL |
| Gibbon                   | MRFVSVSPARKIKTATKMMVITSGNDEDRGGQEKESKEESVLAAMLGIIGTILNLVIVFYIYTTL  | MVITSGNDEDRGGQEKESKEESVLAAMLGIIGTILNLVIVFYIYTTL |
| Chinese_tree_shrew       | MRFVSVLVRKIKTATKMMVITSGNDEDRGGQEKESKEESVLAAMLGIIGTILNLVIVFYIYTTL   | MVITSGNDEDRGGQEKESKEESVLAAMLGIIGTILNLVIVFYIYTTL |
| Microbat                 | MRCVSVLGRKIKTATKMMVITGGNDEDRGGQEKESKEESVLAAMLGIIGTILNLVIVFYIYTTL   | MVITGGNDEDRGGQEKESKEESVLAAMLGIIGTILNLVIVFYIYTTL |
| Rhesus                   | MRFVSVLVRKIKTATKMMVITSGNDEDRGGQEKESKEESVLAAMLGIIGTILNLVIVFYIYTTL   | MVITSGNDEDRGGQEKESKEESVLAAMLGIIGTILNLVIVFYIYTTL |
| Panda                    | MRCVSVLGRKIKTATKMMVITSGNEEDREGQERESKEESVLAAMLGIIGTILNLVIVFYIYTTL   | MVITSGNEEDREGQERESKEESVLAAMLGIIGTILNLVIVFYIYTTL |
| Alpaca                   | MRCVSVLGRKIKTATKMMVITSGNDEDRGGQEKESKEESVLAAMLGIIGTILNLVIVFYIYTTL   | MVITSGNDEDRGGQEKESKEESVLAAMLGIIGTILNLVIVFYIYTTL |
| Chinese_hamster          | MLFVSVLSRKIKTATKMMVITSGNDEDRGGQEPENKEESVLAAMLGIIGTILNLVIVFYIYTTL   | MVITSGNDEDRGGQEPENKEESVLAAMLGIIGTILNLVIVFYIYTTL |
| Cat                      | MRCVSVLGRKIKTATKMMVITSGNDEDRGGQERESKEESVLAAMLGIIGTILNLVIVFYIYTTL   | MVITSGNDEDRGGQERESKEESVLAAMLGIIGTILNLVIVFYIYTTL |
| Tibetan_antelope         | MRCVSVLGRKIKTATKMMVITSGNDEDRGGQEKESKEESVLAAMLGIIGTILNLVIVFYIYTTL   | MVITSGNDEDRGGQEKESKEESVLAAMLGIIGTILNLVIVFYIYTTL |
| Black_flying_fox         | MHCVSVLGRKIKTATKMMVITSGNDEDRGGQEKESKEESVLAAMLGIIGTILNLVIVFYIYTTL   | MVITSGNDEDRGGQEKESKEESVLAAMLGIIGTILNLVIVFYIYTTL |
| Squirrel                 | VLSLTKIKTATKMMVITSGNDEDRGGQEKESKEESVLAAMLGIIGTILNLVIVFYIYTTL       | MVITSGNDEDRGGQEKESKEESVLAAMLGIIGTILNLVIVFYIYTTL |
| Sheep                    | ISLGRKIKTATKMMVITSGNDEDRGGQEKESKEESVLAAMLGIIGTILNLVIVFYIYTTL       | MVITSGNDEDRGGQEKESKEESVLAAMLGIIGTILNLVIVFYIYTTL |
| David's_myotis_bat       | GSLGRKIKTATKMMVITSGNDEDRGGQEKESKEESVLAAMLGIIGTILNLVIVFYIYTTL       | MVITSGNDEDRGGQEKESKEESVLAAMLGIIGTILNLVIVFYIYTTL |
| Wallaby                  | VLSLRRRIKTLAAMVITSGNEEDREGQERENKEESVLAAMLGIIGTILNLVIVFYIYTTL       | MVITSGNEEDREGQERENKEESVLAAMLGIIGTILNLVIVFYIYTTL |
| Rock_pigeon              | VILKGRKIKLATKMMVITSGNEEDKGSQEKESKEETILAMLGIIGTILNLVIVFYIYTTL       | MVITSGNEEDKGSQEKESKEETILAMLGIIGTILNLVIVFYIYTTL  |
| Saker_falcon             | VILKGRKIKLATKMMVITSGNEEDKGSQEKESKEETILAMLGIIGTILNLVIVFYIYTTL       | MVITSGNEEDKGSQEKESKEETILAMLGIIGTILNLVIVFYIYTTL  |
| Collared_flycatcher      | VILKGRKIKLATKMMVITSGNEEDKGSQEKESKEETILAMLGIIGTILNLVIVFYIYTTL       | MVITSGNEEDKGSQEKESKEETILAMLGIIGTILNLVIVFYIYTTL  |
| White_throated_sparrow   | VILKGRKIKLATKMMVITSGNEEDKGSQEKESKEETILAMLGIIGTILNLVIVFYIYTTL       | MVITSGNEEDKGSQEKESKEETILAMLGIIGTILNLVIVFYIYTTL  |
| Medium_ground_finch      | VILKGRKIKLATKMMVITSGNEEDKGSQEKESKEETILAMLGIIGTILNLVIVFYIYTTL       | MVITSGNEEDKGSQEKESKEETILAMLGIIGTILNLVIVFYIYTTL  |
| Zebra_finch              | VILKGRKIKLATKMMVITSGNEEDKGSQEKESKEETILAMLGIIGTILNLVIVFYIYTTL       | MVITSGNEEDKGSQEKESKEETILAMLGIIGTILNLVIVFYIYTTL  |
| Budgerigar               | VILKGRKIKLATKMMVITSGNEEDKGSQEKESKEETILAMLGIIGTILNLVIVFYIYTTL       | MVITSGNEEDKGSQEKESKEETILAMLGIIGTILNLVIVFYIYTTL  |
| Parrot                   | VILKGRKIKLATKMMVITSGNEEDKGSQEKESKEETILAMLGIIGTILNLVIVFYIYTTL       | MVITSGNEEDKGSQEKESKEETILAMLGIIGTILNLVIVFYIYTTL  |
| Mallard_duck             | ILKGRKIKTLTKMMVITSGNEEDKGSQEKESKEETILAMLGIIGTILNLVIVFYIYTTL        | MVITSGNEEDKGSQEKESKEETILAMLGIIGTILNLVIVFYIYTTL  |
| Chicken                  | ILKGRKIKLATKMMVITSGNEEDKGSQEKESKEETILAMLGIIGTILNLVIVFYIYTTL        | MVITSGNEEDKGSQEKESKEETILAMLGIIGTILNLVIVFYIYTTL  |
| Turkey                   | ILKGRKIKLATKMMVITSGNEEDKGSQEKESKEETILAMLGIIGTILNLVIVFYIYTTL        | MVITSGNEEDKGSQEKESKEETILAMLGIIGTILNLVIVFYIYTTL  |
| Green_seaturtle          | VLSLRRRIKTLTKMMVITSGNEEDKGNQEKESKEETILAMLGIIGTILNLVIVFYIYTTL       | MVITSGNEEDKGNQEKESKEETILAMLGIIGTILNLVIVFYIYTTL  |
| Painted_turtle           | VLSLRRRIKTLTKMMVITSGNEEDKGNQEKESKEETILAMLGIIGTILNLVIVFYIYTTL       | MVITSGNEEDKGNQEKESKEETILAMLGIIGTILNLVIVFYIYTTL  |
| Spiny_softshell_turtle   | ISLRRRLKTLTKMMVITSGNEEDKGNQEKESKEETILAMLGIIGTILNLVIVFYIYTTL        | MVITSGNEEDKGNQEKESKEETILAMLGIIGTILNLVIVFYIYTTL  |
| Lizard                   | VLSLRRRIKTLTKMMVITSGNEEEKSNQEKESKEESVLAAMLGIIGTILNLVIVFYIYTTL      | MVITSGNEEEKSNQEKESKEESVLAAMLGIIGTILNLVIVFYIYTTL |
| X_tropicalis             | VRQESGALEVLTKMVIIGVEGDKESQEKESKEESVLAAMLGIIGTILNLVIVFYIYTTL        | MVIIGVEGDKESQEKESKEESVLAAMLGIIGTILNLVIVFYIYTTL  |
| Tetraodon                | TGLRRKVKTFPGKMVNTLHSDDEEKGQDKESKEESVLAAMLGIIGTILNLVIVFYIYTTL       | MVNTLHSDDEEKGQDKESKEESVLAAMLGIIGTILNLVIVFYIYTTL |
| Fugu                     | IGLRRKVTQTFPGKMVNTLHSDDEEKGQDKESKEESVLAAMLGIIGTILNLVIVFYIYTTL      | MVNTLHSDDEEKGQDKESKEESVLAAMLGIIGTILNLVIVFYIYTTL |
| Yellowbelly_pufferfish   | IGLRRKVTQTFPGKMVNTLHSDDEEKGQDKESKEESVLAAMLGIIGTILNLVIVFYIYTTL      | MVNTLHSDDEEKGQDKESKEESVLAAMLGIIGTILNLVIVFYIYTTL |
| Nile_tilapia             | IGLRRKLQAFPQGMVNTLHSDDEEKGQDKESKEETILAMLGIIGTILNLVIVFYIYTTL        | MVNTLHSDDEEKGQDKESKEETILAMLGIIGTILNLVIVFYIYTTL  |
| Burton_mouthbreeder      | TGLRRKLQAFPQGMVNTLHSDDEEKGQDKESKEETILAMLGIIGTILNLVIVFYIYTTL        | MVNTLHSDDEEKGQDKESKEETILAMLGIIGTILNLVIVFYIYTTL  |
| Zebra_mbuna              | TGLRRKLQAFPQGMVNTLHSDDEEKGQDKESKEETILAMLGIIGTILNLVIVFYIYTTL        | MVNTLHSDDEEKGQDKESKEETILAMLGIIGTILNLVIVFYIYTTL  |
| Pundamilia_nyererei      | TGLRRKLQAFPQGMVNTLHSDDEEKGQDKESKEETILAMLGIIGTILNLVIVFYIYTTL        | MVNTLHSDDEEKGQDKESKEETILAMLGIIGTILNLVIVFYIYTTL  |
| Southern_platyfish       | IGPRKQLKTFAGKMVNAVCSDEEKGQDKESKEESVLAAMLGIIGTILNLVIVFYIYTTL        | MVNAVCSDEEKGQDKESKEESVLAAMLGIIGTILNLVIVFYIYTTL  |
| Atlantic_cod             | SGVRFKLTQTFAGKMVNTYRDEESGQDKESKEESVLAAMLGIIGTILNLVIVFYIYTTL        | MVNTYRDEESGQDKESKEESVLAAMLGIIGTILNLVIVFYIYTTL   |
| Mexican_cavefish         | TGLREKLQTTSEKMNNTLSHDEEKGQDKESKEESVLAAMLGIIGTILNLVIVFYIYTTL        | MVNTLSHDEEKGQDKESKEESVLAAMLGIIGTILNLVIVFYIYTTL  |
| Spotted_gar              | ASLRRKLQTFVTMNTAVSDEEKGQEKESKEESVLAAMLGIIGTILNLVIVFYIYTTL          | MVNTAVSDEEKGQEKESKEESVLAAMLGIIGTILNLVIVFYIYTTL  |

**Supplemental Table 2. BNLN\_pulldown**

| reference             | Gene_Symbol | BNLN_vs_GFP_Fold_Enrichment |
|-----------------------|-------------|-----------------------------|
| sp Q93084 AT2A3_HUMAN | ATP2A3      | 6                           |
| sp P11586 C1TC_HUMAN  | MTHFD1      | 3                           |
| sp Q96JG6 VPS50_HUMAN | VPS50       | 3                           |
| sp Q9H0B6 KLC2_HUMAN  | KLC2        | 3                           |
| sp O60313 OPA1_HUMAN  | OPA1        | 2.5                         |
| sp P04406 G3P_HUMAN   | GAPDH       | 2.5                         |
| sp P16435 NCPR_HUMAN  | POR         | 2.5                         |
| sp Q92616 GCN1_HUMAN  | GCN1        | 2.5                         |
| sp O00159 MYO1C_HUMAN | MYO1C       | 2.111111111                 |
| sp O00291 HIP1_HUMAN  | HIP1        | 2                           |
| sp O60762 DPM1_HUMAN  | DPM1        | 2                           |
| sp P02786 TFR1_HUMAN  | TFRC        | 2                           |
| sp P06493 CDK1_HUMAN  | CDK1        | 2                           |
| sp P20336 RAB3A_HUMAN | RAB3A       | 2                           |
| sp P20337 RAB3B_HUMAN | RAB3B       | 2                           |
| sp P21281 VATB2_HUMAN | ATP6V1B2    | 2                           |
| sp P23528 COF1_HUMAN  | CFL1        | 2                           |
| sp P26358 DNMT1_HUMAN | DNMT1       | 2                           |
| sp P27338 AOFB_HUMAN  | MAOB        | 2                           |
| sp P39023 RL3_HUMAN   | RPL3        | 2                           |
| sp P54652 HSP72_HUMAN | HSPA2       | 2                           |
| sp P62834 RAP1A_HUMAN | RAP1A       | 2                           |
| sp Q6IQ26 DEN5A_HUMAN | DENND5A     | 2                           |
| sp Q7L014 DDX46_HUMAN | DDX46       | 2                           |
| sp Q8N1F7 NUP93_HUMAN | NUP93       | 2                           |
| sp Q8NHH9 ATLA2_HUMAN | ATL2        | 2                           |
| sp Q969V3 NCLN_HUMAN  | NCLN        | 2                           |
| sp Q96KG9 SCYL1_HUMAN | SCYL1       | 2                           |
| sp Q99436 PSB7_HUMAN  | PSMB7       | 2                           |
| sp Q9BSJ2 GCP2_HUMAN  | TUBGCP2     | 2                           |
| sp Q9NR31 SAR1A_HUMAN | SAR1A       | 2                           |
| sp Q9NZ01 TECR_HUMAN  | TECR        | 2                           |
| sp Q9UBX3 DIC_HUMAN   | SLC25A10    | 2                           |
| sp Q9Y5V3 MAGD1_HUMAN | MAGED1      | 2                           |

Supplemental Table 3. Mandatory Information. Human islets donor infirmation.

| ID   | RRID         | Sex  | Age (years) | BMI (kg/m <sup>2</sup> ) | HbA1c         | Diabetes History | Origin/Source of Islets | Figure(s) |
|------|--------------|------|-------------|--------------------------|---------------|------------------|-------------------------|-----------|
| R297 | None         | Male | 69          | 27.2                     | not available | No               | Alberta Islet Core      | 5F.H.I    |
| R301 | None         | Male | 18          | 19                       | 5             | No               | Alberta Islet Core      | 5G.H.I    |
| R305 | None         | Male | 60          | 21                       | 5.6           | No               | Alberta Islet Core      | 5H.I      |
| R308 | None         | Male | 20          | 19.8                     | 5.5           | No               | Alberta Islet Core      | 5H        |
| R310 | None         | Male | 25          | 26.4                     | 5.4           | No               | Alberta Islet Core      | 5H.I      |
| R317 | None         | Male | 54          | 26.4                     | 5.1           | No               | Alberta Islet Core      | 5H.I      |
| R318 | SAMN11605767 | Male | 54          | 20.5                     | 5             | No               | Alberta Islet Core      | 5I        |
| R327 | SAMN12220836 | Male | 57          | 33.9                     | 5.8           | No               | Alberta Islet Core      | 5I        |

Table 2. Recommended Information

| ID   | Cause of Death              | Cold Ischemia Time (h) | Estimated Purity (%) | Islet Index | Stimulation Index GSIS |
|------|-----------------------------|------------------------|----------------------|-------------|------------------------|
| R297 | Neurological                | 13.25                  | 95                   | 1.1         | 6.05                   |
| R301 | Neurological                | 5.00                   | 75                   | 0.91        | 14.93                  |
| R305 | Neurological                | 10.00                  | 80                   | 1.05        | 2.15                   |
| R308 | Neurological                | 15.25                  | 80                   | 0.87        | 5.90                   |
| R310 | Neurological                | 11.25                  | 90                   | 0.82        | 4.43                   |
| R317 | Medical Assistance in Dying | 21.00                  | 90                   | 1.25        | 19.36                  |
| R318 | Neurological                | 16.00                  | 90                   | 1.03        | 7.25                   |
| R327 | Neurological                | 11.50                  | 90                   | 0.91        | 4.45                   |
